# Supplementary material for: A novel smartphone HPTLC assaying platform versus traditional densitometric method for simultaneous quantification of alfuzosin and solifenacin in their dosage forms as well as monitoring content uniformity and drug residues on the manufacturing equipment
Source: Royal Society of Chemistry journal article supplement (doi:10.1039/d3ra01211e), 2023-01-01
Supplement: d3ra01211e1.pdf [file d3ra01211e1.pdf]

Electronic Supplementary Information  
For

**A novel smartphone HPTLC assaying platform *versus* traditional densitometric method for simultaneous quantification of Alfuzosin and Solifenacin in their dosage forms as well as monitoring content uniformity and drug residues on manufacturing equipment**

*Mina Wadie\**, Ezzat M. Abdel-Moety, Mamdouh R. Rezk and Hoda M. Marzouk

*Analytical Chemistry Department, Faculty of Pharmacy - Cairo University, Kasr El-Aini Street, ET-11562, Cairo - Egypt.*

\*Corresponding author: Mina Wadie

e-mail address: [mina.wa.yousif@pharma.cu.edu.eg](mailto:mina.wa.yousif@pharma.cu.edu.eg)

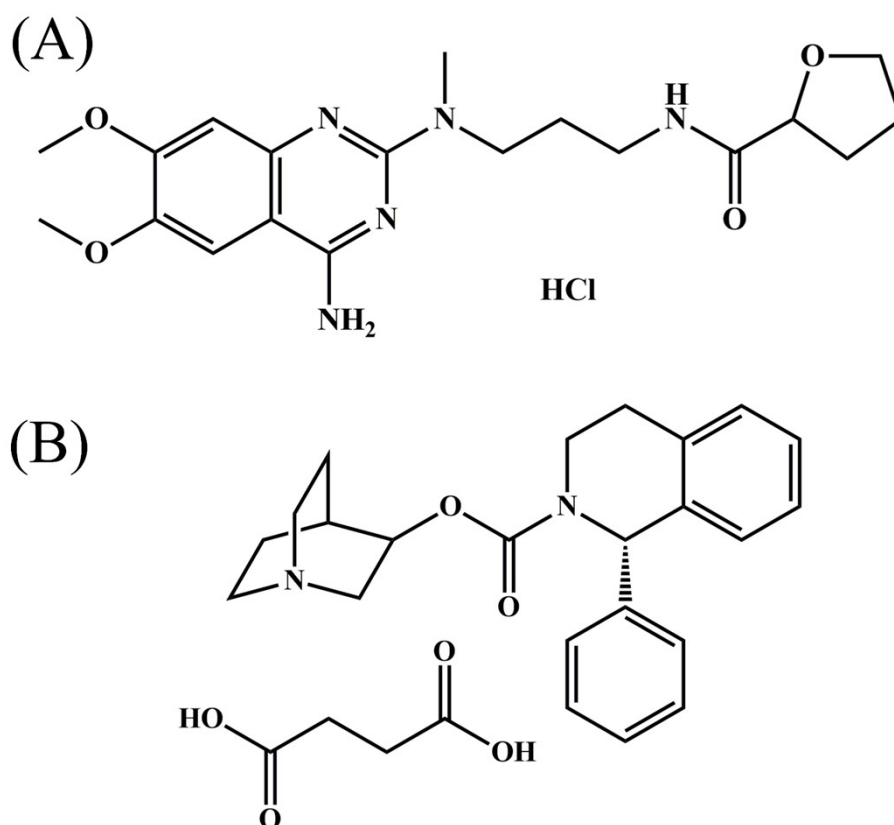

**Fig. S1.** Chemical structures of (A): Alfuzosin hydrochloride (ALF) and (B): Solifenacin succinate (SOL).

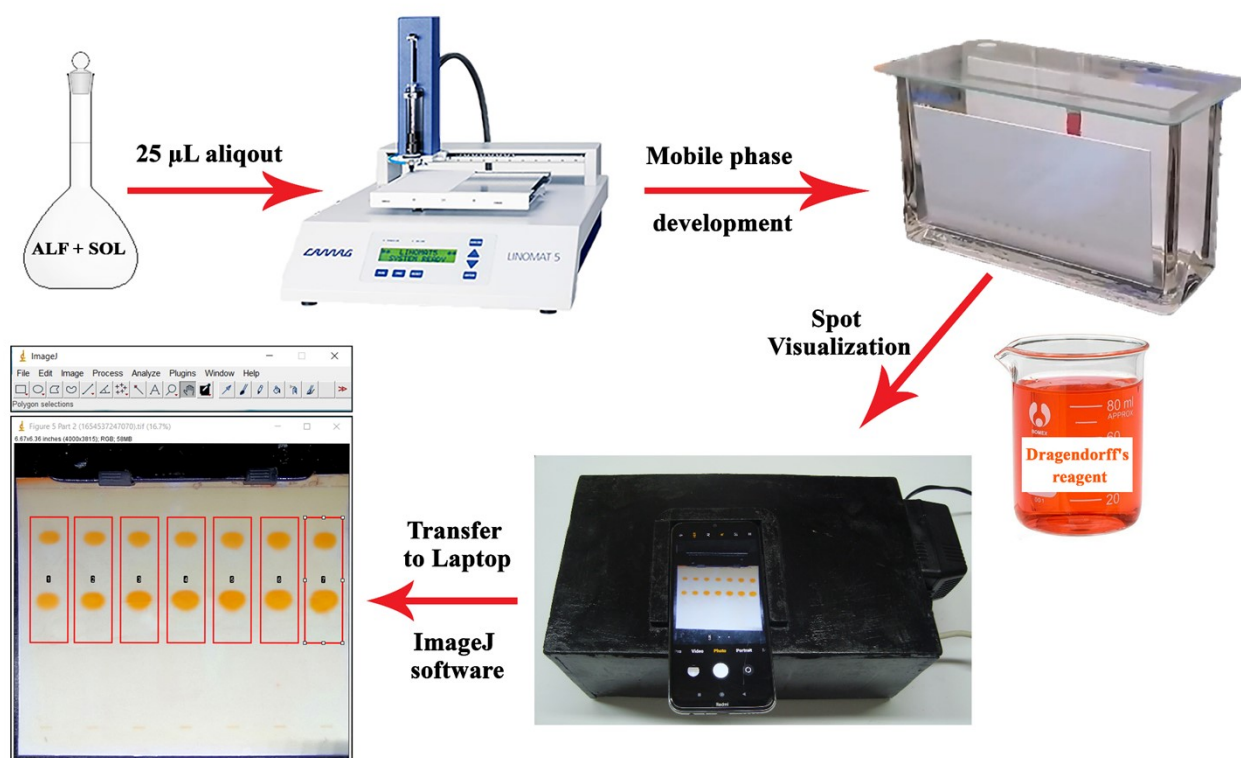

**Fig. S2.** Schematic illustration for different procedures of the proposed HPTLC/smartphone method for alfuzosin and solifenacin quantification.

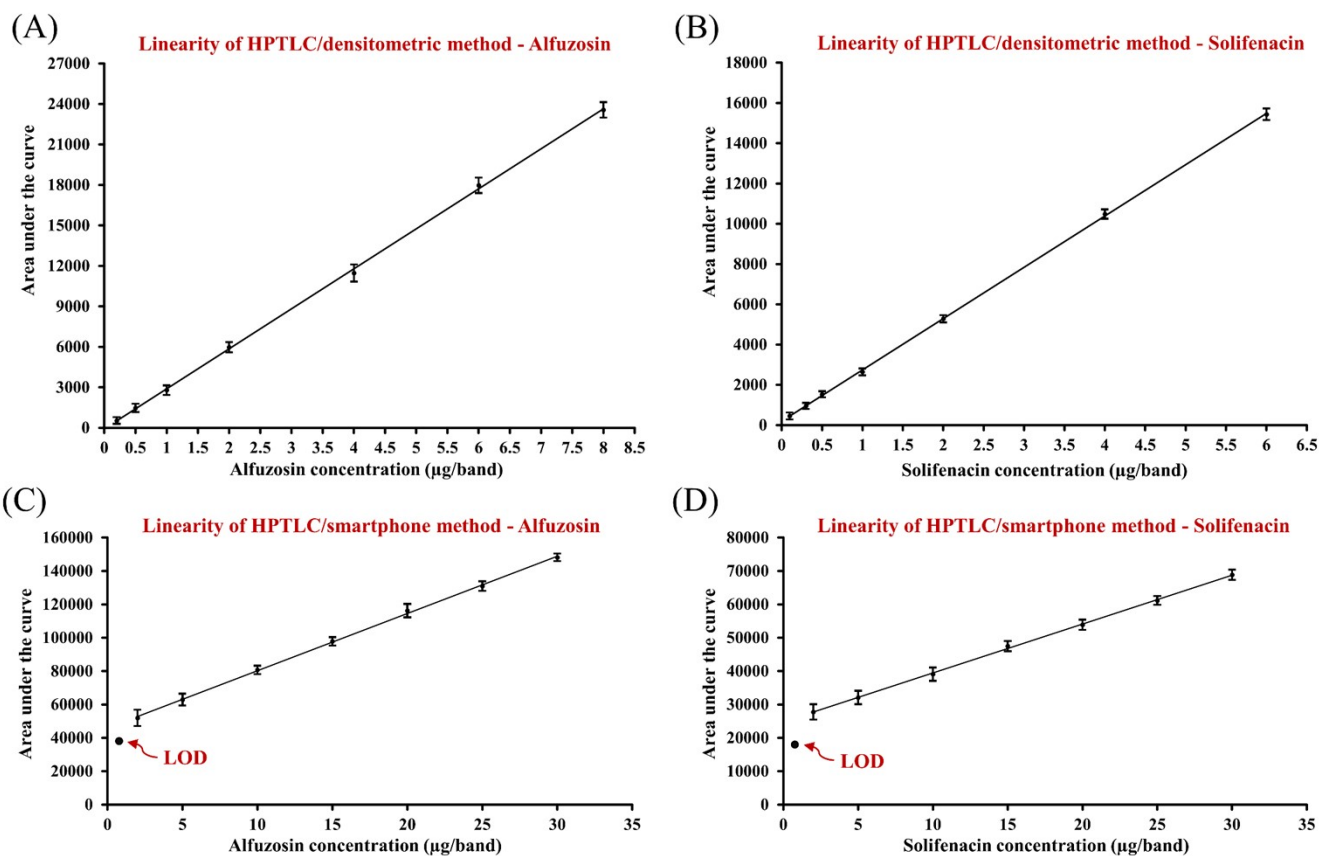

**Fig. S3.** Linearity plots for (A, C) alfuzosin and (B, D) solifenacin determination by the proposed HPTLC/densitometric & HPTLC/smartphone methods, respectively.

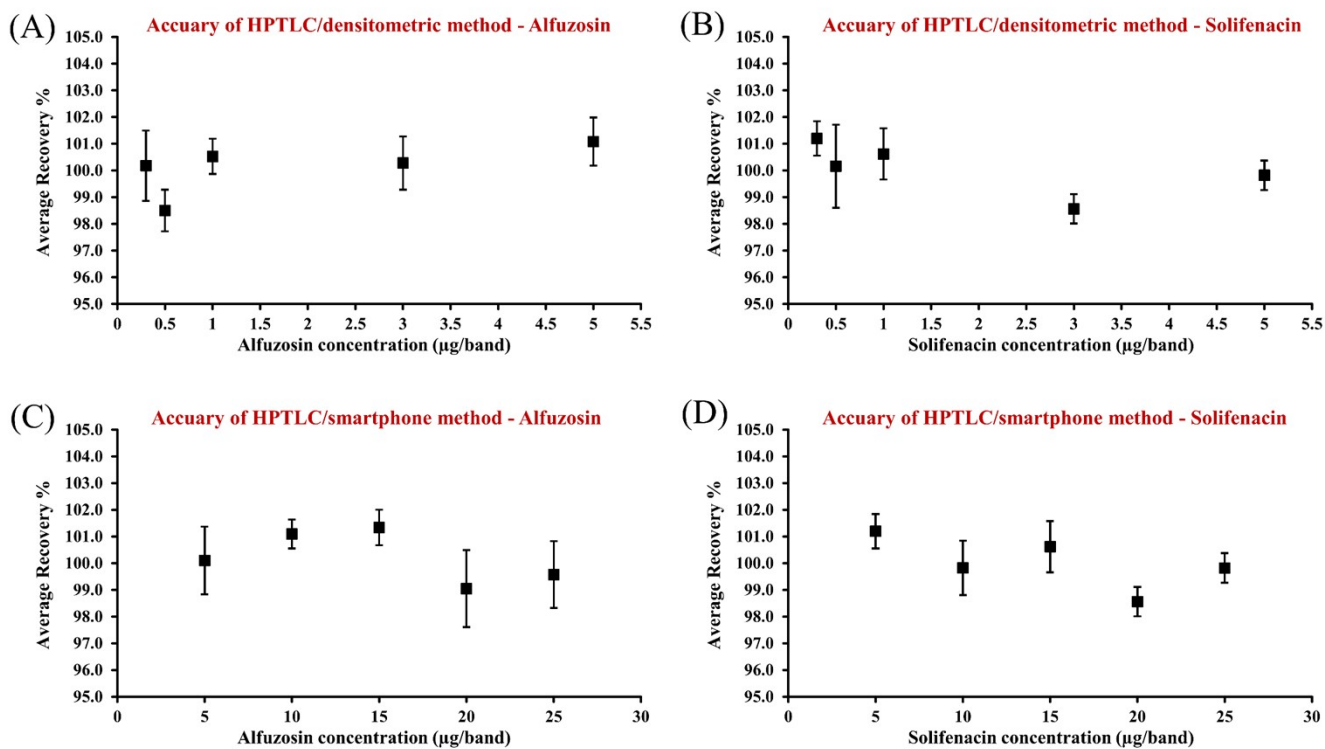

**Fig. S4.** Accuracy plots for (A, C) alfuzosin and (B, D) solifenacin determination by the proposed HPTLC/densitometric & HPTLC/smartphone methods, respectively.

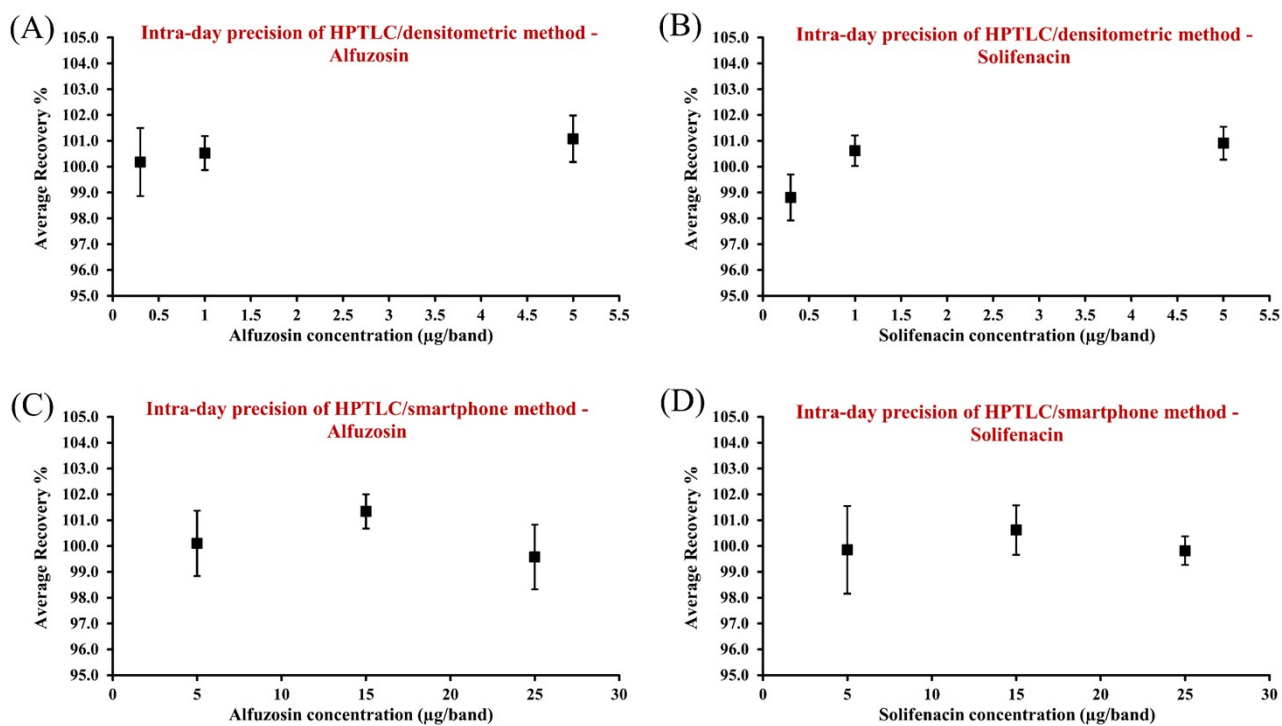

**Fig. S5.** Intra-day precision plots for (A, C) alfuzosin and (B, D) solifenacin determination by the proposed HPTLC/densitometric & HPTLC/smartphone methods, respectively.

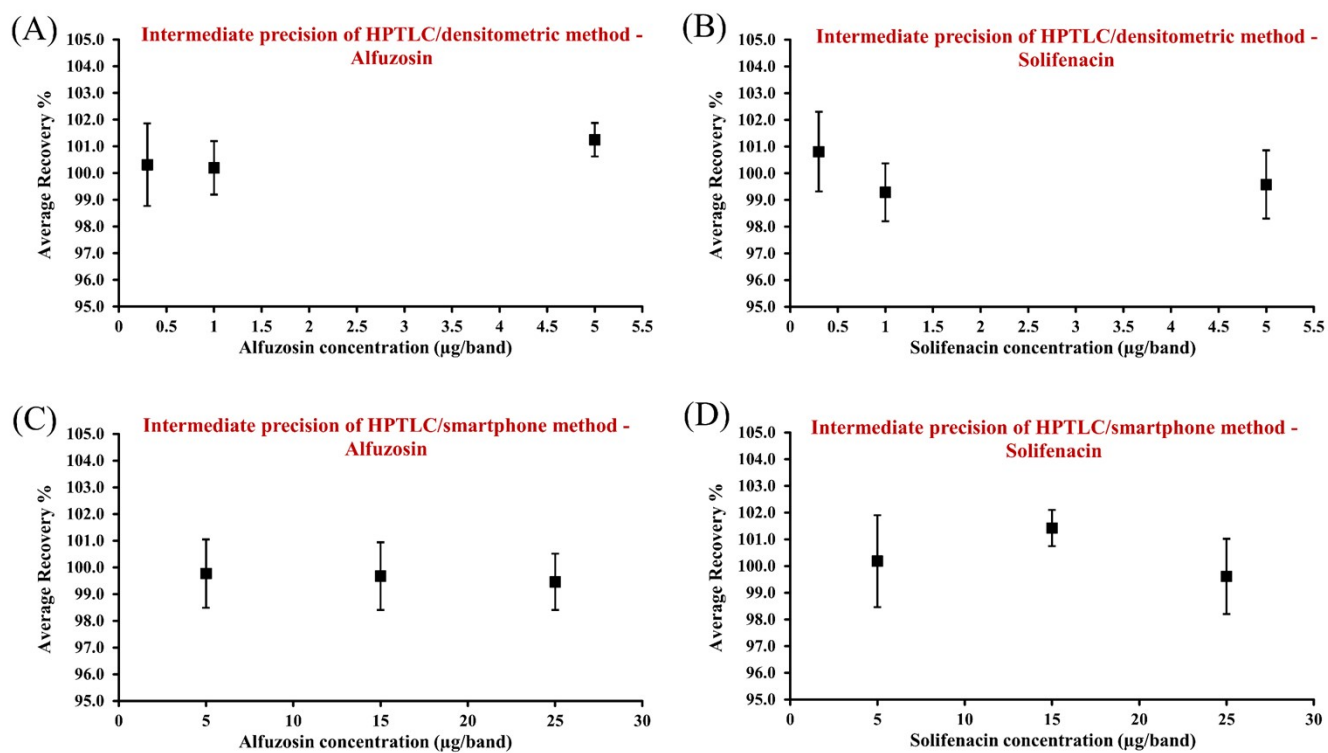

**Fig. S6.** Intermediate precision plots for (A, C) alfuzosin and (B, D) solifenacin determination by the proposed HPTLC/densitometric & HPTLC/smartphone methods, respectively.

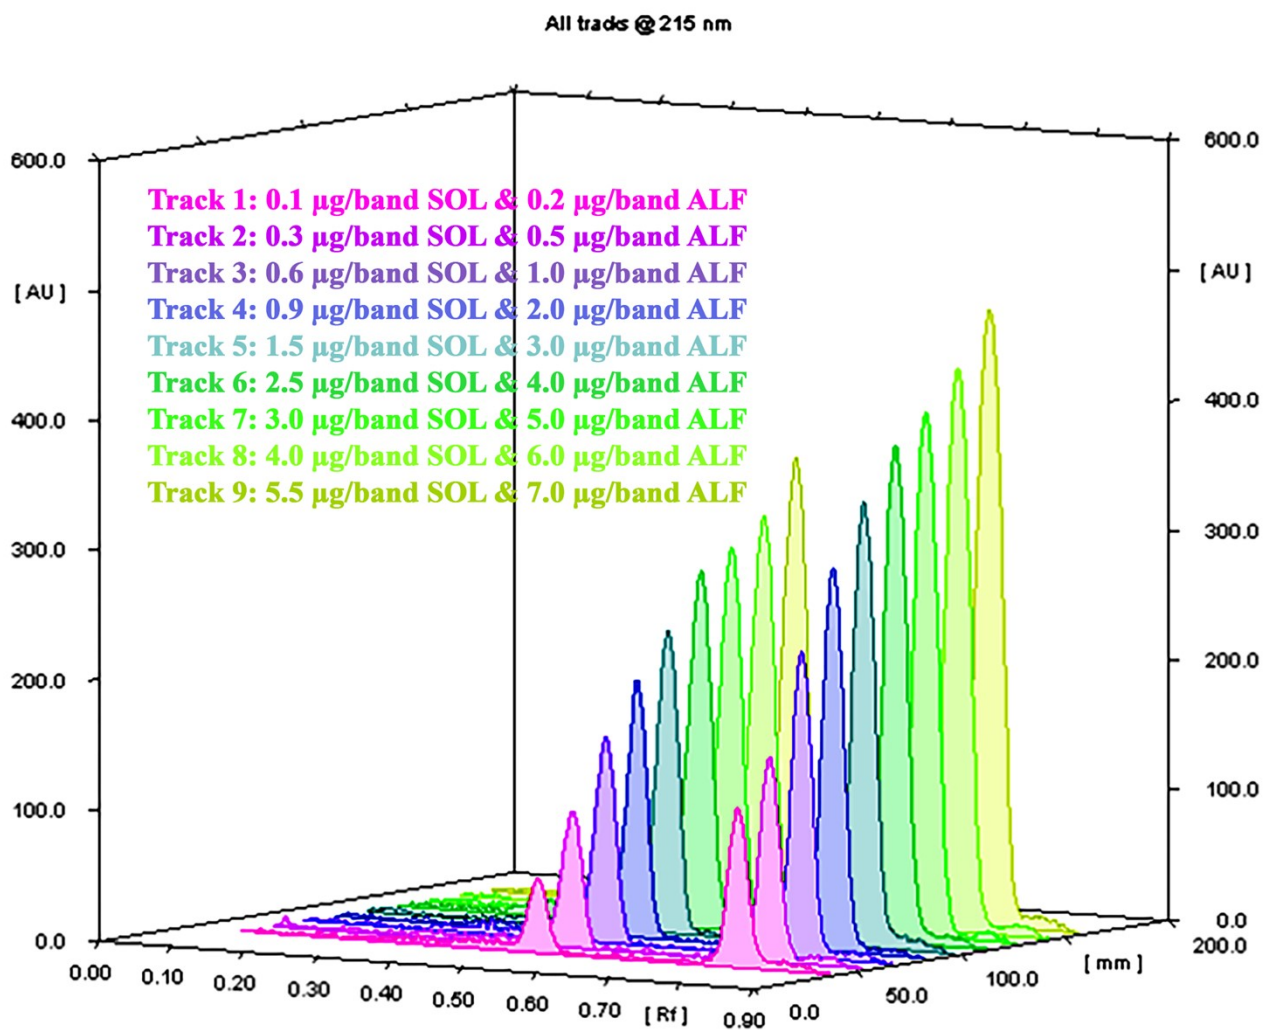

**Fig. S7.** Scanning 3D profiles of different laboratory prepared mixtures containing increasing concentration of the two studied drugs; solifenacin ( $R_f \approx 0.50$ ) and alfuzosin ( $R_f \approx 0.77$ ) in range of 0.1 - 5.5 µg/band and 0.2 - 7.0 µg/band, respectively.

**Table S1.** Results of content uniformity testing for determining alfuzosin and solifenacin in Solitral® capsules by the two proposed HPTLC methods

| Capsule no.            | Label claim (%)            |              |                         |              |
|------------------------|----------------------------|--------------|-------------------------|--------------|
|                        | HPTLC/densitometric method |              | HPTLC/smartphone method |              |
|                        | ALF                        | SOL          | ALF                     | SOL          |
| 1                      | 99.61                      | 99.48        | 99.42                   | 99.89        |
| 2                      | 101.23                     | 100.23       | 100.98                  | 100.87       |
| 3                      | 99.32                      | 98.52        | 99.11                   | 98.78        |
| 4                      | 98.74                      | 98.69        | 98.97                   | 98.91        |
| 5                      | 100.95                     | 101.21       | 101.27                  | 101.84       |
| 6                      | 98.37                      | 99.84        | 98.88                   | 99.91        |
| 7                      | 98.96                      | 100.87       | 99.45                   | 101.24       |
| 8                      | 99.89                      | 101.89       | 100.78                  | 101.28       |
| 9                      | 101.58                     | 99.27        | 101.89                  | 99.53        |
| 10                     | 101.46                     | 98.68        | 101.95                  | 98.91        |
| Mean                   | 100.01                     | 99.87        | 100.27                  | 100.12       |
| SD                     | 1.202                      | 1.162        | 1.228                   | 1.120        |
| RSD%                   | 1.201                      | 1.163        | 1.225                   | 1.119        |
| Acceptance value (AV)* | <b>2.884</b>               | <b>2.788</b> | <b>2.947</b>            | <b>2.688</b> |
| Maxi. allowed AV (L1)  | 15                         | 15           | 15                      | 15           |

\* Acceptance value =  $2.4 \times SD$



**Table S2.** Statistical comparison of the results obtained by the two proposed HPTLC methods and official methods for the analysis of alfuzosin and solifenacin.

| Parameter                                | HPTLC/densitometric method |        | HPTLC/smartphone method |        | Official methods |                  |
|------------------------------------------|----------------------------|--------|-------------------------|--------|------------------|------------------|
|                                          | ALF                        | SOL    | ALF                     | SOL    | ALF <sup>a</sup> | SOL <sup>b</sup> |
| Mean of recoveries                       | 100.18                     | 100.08 | 100.23                  | 100.03 | 100.45           | 99.35            |
| S.D.                                     | 0.962                      | 1.140  | 0.978                   | 1.216  | 0.410            | 1.695            |
| Variance                                 | 0.926                      | 1.301  | 0.956                   | 1.478  | 0.168            | 2.874            |
| n                                        | 5                          | 5      | 5                       | 5      | 5                | 5                |
| Student's t-test<br>(2.306) <sup>c</sup> | 0.572                      | 0.807  | 0.456                   | 0.729  | -                | -                |
| F-test<br>(6.388) <sup>c</sup>           | 5.503                      | 2.210  | 5.680                   | 1.945  | -                | -                |

<sup>a</sup> ALF is determined by non-aqueous titration by dissolving 0.3 g in a mixture of 40 mL of anhydrous acetic acid and 40 mL of acetic anhydride and using 0.1 M perchloric acid as titrant with potentiometric detection of endpoint as per the British Pharmacopoeia.

<sup>b</sup> SOL is determined by non-aqueous titration by dissolving 0.4 g in 50 mL of anhydrous acetic acid and using 0.1 M perchloric acid as titrant with potentiometric detection of endpoint as per the British Pharmacopoeia.

<sup>c</sup> The values in parentheses represent the corresponding tabulated values of t and F at p=0.05.
